# Supplementary material
Source: PubMed Central journal article supplement (PMC4829544)
Supplement: ijmsv13p0304s1.pdf [file ijmsv13p0304s1.pdf]

**Table S1. Odds ratio (OR) and 95% confidence interval (CI) of clinical status and *HMGB1* rs1045411 genotypic frequencies in 324 HCC patients.**

| Variable                     | Genotypic frequencies |               |                     | p value |
|------------------------------|-----------------------|---------------|---------------------|---------|
|                              | CC (N=223)            | CT+TT (N=101) | OR (95% CI)         |         |
| <b>Clinical Stage</b>        |                       |               |                     |         |
| Stage I/II                   | 148 (66.4%)           | 66 (65.3%)    | 1.00                | p=0.857 |
| Stage III/IV                 | 75 (33.6%)            | 35 (34.7%)    | 1.046 (0.638-1.717) |         |
| <b>Tumor size</b>            |                       |               |                     |         |
| ≤ T2                         | 150 (67.3%)           | 67 (66.3%)    | 1.00                | p=0.869 |
| > T2                         | 73 (32.7%)            | 34 (33.7%)    | 1.043 (0.633-1.717) |         |
| <b>Lymph node metastasis</b> |                       |               |                     |         |
| No                           | 216 (96.9%)           | 97 (96.0%)    | 1.00                | p=0.705 |
| Yes                          | 7 (3.1%)              | 4 (4.0%)      | 1.272 (0.364-4.448) |         |
| <b>Distant metastasis</b>    |                       |               |                     |         |
| No                           | 211 (94.6%)           | 95 (94.1%)    | 1.00                | p=0.839 |
| Yes                          | 12 (5.4%)             | 6 (5.9%)      | 1.111 (0.405-3.047) |         |
| <b>Vascular invasion</b>     |                       |               |                     |         |
| No                           | 181 (81.2%)           | 86 (85.1%)    | 1.00                | p=0.383 |
| Yes                          | 42 (18.8%)            | 15 (14.9%)    | 0.752 (0.395-1.430) |         |
| <b>Child-Pugh grade</b>      |                       |               |                     |         |
| A                            | 171 (76.7%)           | 75 (74.3%)    | 1.00                | p=0.636 |
| B or C                       | 52 (23.3%)            | 26 (25.7%)    | 1.140 (0.662-1.963) |         |
| <b>HBsAg</b>                 |                       |               |                     |         |
| Negative                     | 128 (57.4%)           | 59 (58.4%)    | 1.00                | p=0.864 |
| Positive                     | 95 (42.6%)            | 42 (41.6%)    | 0.959 (0.596-1.545) |         |
| <b>Anti-HCV</b>              |                       |               |                     |         |
| Negative                     | 122 (54.7%)           | 49 (48.5%)    | 1.00                | p=0.301 |
| Positive                     | 101 (45.3%)           | 52 (51.5%)    | 1.282 (0.800-2.053) |         |
| <b>Liver cirrhosis</b>       |                       |               |                     |         |
| Negative                     | 45 (20.2%)            | 20 (19.8%)    | 1.00                | p=0.937 |
| Positive                     | 178 (79.8%)           | 81 (80.2%)    | 1.024 (0.568-1.844) |         |

The ORs with analyzed by their 95% CIs were estimated by logistic regression models.  
 > T2: multiple tumor more than 5 cm or tumor involving a major branch of the portal or hepatic vein(s)
